# Supplementary material for: Continuous selective conversion of methane to methanol over a Cu-KFI zeolite catalyst using a water–O2 mixture as the oxygen source
Source: Royal Society of Chemistry journal article supplement (doi:10.1039/d3cc05379b), 2023-11-29
Supplement: d3cc05379b1.pdf [file d3cc05379b1.pdf]

## Supporting Information

### Continuous selective conversion of methane to methanol over Cu-KFI zeolite catalyst using water-O<sub>2</sub> mixture as the oxygen source

Hailong Zhang<sup>a, \*</sup>, Jiaxiu Guo<sup>a</sup>, Yi Cao<sup>b, \*</sup>

<sup>a</sup>College of Carbon Neutrality Future Technology, Sichuan University, Chengdu 610064, PR China;

<sup>b</sup>School of materials science and chemical engineering, Ningbo University, Ningbo, Zhejiang, 315211, PR China.

Corresponding authors:

H.L. Zhang ([hailongzhang@scu.edu.cn](mailto:hailongzhang@scu.edu.cn); [catalysis5785@126.com](mailto:catalysis5785@126.com))

Y. Cao ([Caoyi@nbu.edu.cn](mailto:Caoyi@nbu.edu.cn))

## Content

|                                                                                           |    |
|-------------------------------------------------------------------------------------------|----|
| S1. Materials and method .....                                                            | 3  |
| S1.1. Zeolite synthesis .....                                                             | 3  |
| S1.2. Ion-exchanged procedures .....                                                      | 3  |
| S1.3. Characterization methods .....                                                      | 5  |
| S1.4. Catalytic continuous MTM conversion tests .....                                     | 5  |
| S1.5. Temperature-programmed surface reaction (TPSR) coupled with isotope labelling ..... | 6  |
| S2. Characterization results .....                                                        | 7  |
| S2.1. Structure and morphology of KFI and CHA zeolites.....                               | 7  |
| S2.2. HAADF-STEM and H <sub>2</sub> -TPR of Cu-KFI .....                                  | 9  |
| S3. Reaction results .....                                                                | 10 |
| S4. References .....                                                                      | 15 |

## S1. Materials and method

### S1.1. Zeolite synthesis

**KFI:** The molar ratio of the synthetic gel was  $\text{SiO}_2 : 0.38 \text{ KOH} : 0.2 \text{ Al(OH)}_3 : 0.01 \text{ Sr(OH)}_2 : 15 \text{ H}_2\text{O}$ . 4.98 g of KOH ( $\geq 85\%$ , Shanghai Macklin Biochemical Co., Ltd) was dissolved in 10 g of  $\text{H}_2\text{O}$ . 3.12 g of  $\text{Al(OH)}_3$  (99%, Shanghai Macklin Biochemical Co., Ltd) was added into the above KOH solution, and it was heated to 100 °C until clear, then it was cooled down to the room temperature and denoted as alkali solution. 0.531 g of  $\text{Sr(OH)}_2 \cdot 8 \text{ H}_2\text{O}$  (95%, Sinopharm Chemical Reagent Co., Ltd) was dissolved in 14 g of  $\text{H}_2\text{O}$ , and  $\text{Sr(OH)}_2$  solution was added dropwise in 40 g of Silica solution (30%, Sigma-Aldrich) to form a homogenous viscous gel. The above alkali solution was poured into the homogenous viscous gel, and 4g of  $\text{H}_2\text{O}$  was applied to transfer the residual alkali solution into the homogenous viscous gel, then it was stirred vigorously to obtain homogenous gel. The obtained gel was poured into the PTFE-lined autoclave and transferred into a high-temperature oven for crystallization under 145 °C for 120 h. After the crystallization process, the autoclave was taken out to cool down naturally. Finally, the obtained zeolite was separated, washed and dried overnight.

**CHA (SSZ-13):** In order to synthesize SSZ-13 with low SAR (Si/Al ratio), SSZ-13 seed was synthesized with template-free method. The molar composition of gel was  $0.38 \text{ KOH} : 0.017 \text{ Sr(OH)}_2 : 0.2 \text{ Al(OH)}_3 : 1 \text{ SiO}_2 : 39 \text{ H}_2\text{O}$ . The gel was poured to a PTFE-lined autoclave and placed into rotation oven at 175 °C for 24 h. Finally, the seeds were recovered with centrifugation, tilting, washing and drying under the same conditions with the synthesis of KFI.

**Other zeolites:** The other zeolites such as H-MOR (Si/Al = 11), H-ZSM-5 (MFI-type, Si/Al = 15), H-SSZ-39 (AEI-type, Si/Al = 10) and H-SSZ-13 (CHA-type, Si/Al = 10) were commercial purchase.

### S1.2. Ion-exchanged procedures

**$\text{NH}_4^+$ -exchange:** The  $\text{NH}_4^+$ -exchange of the synthesized KFI and CHA zeolites was

performed in 100 mL of 0.1 M  $\text{NH}_4\text{NO}_3$  (99 wt%) aqueous solution (100 mL deionized water and 0.8 g  $\text{NH}_4\text{NO}_3$ ). The solution was stirred at 80 °C for 6 h during the ion-exchange process. After  $\text{NH}_4^+$ -exchange, the ion-exchanged zeolites were separated and washed via centralization for 3-5 times using deionized water, and then dried at 80 °C for a day. The same exchange procedure was repeated for 3 times using the above exchanged zeolites in a new  $\text{NH}_4\text{NO}_3$  solution under the same conditions. The final  $\text{NH}_4^+$ -zeolites were calcined at 500 °C for 5 h after drying at 80 °C for a day to obtain H-type zeolites.

**$\text{Cu}^{2+}$ -exchange:** 2 g of zeolite powder was stirred in 100 mL of copper(II) nitrate trihydrate ( $\text{Cu}(\text{NO}_3)_2 \cdot 3\text{H}_2\text{O}$ , 99.99%, Sinopharm Chemical Reagent Co., Ltd) at 80 °C. The loading amount of copper and the Cu/Al ratios were determined by controlling the concentration of copper(II) nitrate solutions and the ion-exchange time. Subsequently, the suspension was centrifugalized and rinsed 3-4 times with deionized water (50 mL each time) to remove the surplus copper ions and ensure the pores in zeolites only contained the exchanged copper ions. The copper-exchanged samples were finally dried at 60 °C for a day and calcined in static air at 550 °C for 6 h with a heating rate of 1 °C  $\text{min}^{-1}$ . Copper (Cu), aluminum (Al) and silicon (Si) contents were measured by wavelength dispersive X-ray fluorescence (WDXRF) on a S8 TIGER X-ray fluorescence spectrometer (Bruker, Germany). The X-ray fluorescent spectra of Cu-zeolite samples were collected under vacuum condition with the working voltage of 60 kV and the electric current of 40 mA.

**Table S1.** The composition of Cu-exchanged zeolites.

| Cu-zeolite | Si/Al | Cu loading (wt%) | Cu/Al |
|------------|-------|------------------|-------|
| Cu-KFI     | 3.5   | 0.45             | 0.037 |
| Cu-KFI     | 3.5   | 2.04             | 0.17  |
| Cu-CHA     | 4.1   | 1.9              | 0.18  |
| Cu-CHA     | 10    | 2.1              | 0.43  |
| Cu-MOR     | 11    | 2.1              | 0.47  |
| Cu-SSZ-39  | 10    | 2.2              | 0.45  |
| Cu-ZSM-5   | 15    | 1.7              | 0.51  |

### **S1.3. Characterization methods**

X-ray diffraction (XRD) patterns of Cu-zeolite samples were measured on Rigaku Ultima IV using Cu K $\alpha$  radiation ( $\lambda = 0.15406$  nm, 40 kV, 40 mA). Morphology of the as-prepared KFI zeolite was measured through Scanning Electron Microscopy (SEM) on a QUANTA 400F Field Emission microscope operated at 20 kV. High angle annular dark field scanning transmission electron microscopy (HAADF-STEM) was carried out to confirm the presence of copper atoms located on Cu-KFI catalyst on a FEI Talos electron microscope. XPS (X-ray photoelectron spectroscopy) measurement of Cu-KFI was conducted on the AXIS Ultra DLD (Shimadzu Kratos Ltd., JPN) to obtain the chemical states of surface Cu species. Temperature-programmed reduction with hydrogen (H<sub>2</sub>-TPR) was performed using TCD as detector to identify the copper species confined in KFI zeolite. Prior to H<sub>2</sub>-TPR, the Cu ion-exchanged KFI (50 mg) was pretreated at 400 °C in the flowing He (30 ml min<sup>-1</sup>) for 30 min, then cooled down to room temperature (RT), H<sub>2</sub>-TPR was carried out in the flowing 5% H<sub>2</sub>/Ar (30 mL min<sup>-1</sup>) at a ramp of 8 °C/min. The signal of H<sub>2</sub> consumption was recorded by TCD detector. FTIR spectra of Cu-KFI samples were measured on a Nicolet IS50 FTIR spectrometer in the diffuse reflectance mode equipped with a high sensitivity mercury-cadmium-telluride (MCT) detector and a high-temperature reaction cell with KBr window. The sample was first pretreated at 400 °C in the flowing He for 30 min, then the temperature was controlled to 200 °C and the IR spectrum of the sample was recorded using KBr powders as the background. Diffuse reflectance UV-Vis spectra of Cu-zeolite samples were measured to identify copper species on a Cary Series UV-Vis spectrophotometer (Agilent Technologies) in the diffuse reflectance mode equipped with a high-temperature reaction cell. The sample was firstly pretreated in the flowing He (30 ml min<sup>-1</sup>) at 400 °C for 30 min, then cooled down to RT and the spectrum was collected, using BaSO<sub>4</sub> as the background.

### **S1.4. Catalytic continuous MTM conversion tests**

Continuous MTM conversion was carried out in a tubular reactor (U-shaped quartz

tube, I.D. 8.0 mm) with a continuous flow of 15 ml min<sup>-1</sup> (GHSV = 9000 ml g<sub>cat.</sub><sup>-1</sup> h<sup>-1</sup>) under 1 bar pressure. The reactor was heated through a single-zone furnace. K-type thermocouple was mounted into the oven and used to control the reaction temperature. 100 mg of Cu-KFI zeolite (40-60 mesh, 0.3-0.45 mm) were packed between quartz wool plugs in the reactor and placed in the furnace heating zone. The reaction gas mixture, i.e., 90% CH<sub>4</sub>, 3.2% H<sub>2</sub>O, 100 ppm O<sub>2</sub>, He as the balance, was fed into the reactor and their flow rates were controlled by independent mass flow meters (Bronkhorst). The steam was introduced into the reactor through a saturator maintained at 25 °C. In the continuous MTH conversion process, the Cu-exchanged zeolite was firstly pretreated in the flowing helium (15 ml min<sup>-1</sup>) at 400 °C for 30 min with a heating rate of 5 °C min<sup>-1</sup> and then exposed in the reaction gas mixture in a reaction temperature range of 200-550 °C. The effluent products were identified and quantified on a mass spectrometer (MS, ThermoStar, GSD320, Shanghai, China) based on MS signals of methanol (CH<sub>3</sub>OH), formaldehyde (HCHO), dimethyl ether ((CH<sub>3</sub>)<sub>2</sub>O) and carbon dioxide (CO<sub>2</sub>) at m/z = 31, 30, 45 and 44. The space-time yields (STYs) of the products were calculated as follows:

$$Y_i = \frac{k_i \times M_{Cu}}{m \times x\%} \int_0^{60} I_i dt$$

where  $Y_i$ ,  $k_i$ ,  $I_i$ ,  $M_{Cu}$ ,  $m$ ,  $x\%$  and  $t$  refer to the space-time yield of  $i$ -product (mol mol<sub>Cu</sub><sup>-1</sup> h<sup>-1</sup>), the calibration coefficient, the MS intensity of  $i$ -product, the molar mass of copper (g mol<sup>-1</sup>), the mass of Cu-zeolite used for methane-steam conversion (0.1 g), the content (wt.%) of copper in per gram catalyst and the continuous reaction time (min), respectively.

The selectivity of methanol ( $S_{CH_3OH}$ ) was calculated as the following equation:

$$S_{CH_3OH} = \frac{Y_{CH_3OH}}{\sum iY_i}$$

### **S1.5. Temperature-programmed surface reaction (TPSR) coupled with isotope labelling**

Temperature-programmed surface reaction (TPSR) coupled with deuterium and <sup>18</sup>O

labelling experiments were performed in a fixed-bed reactor to reveal the oxygen source of MTM. 100 mg of Cu-zeolite sample (40-60 mesh, 0.3-0.45 mm) was placed in a U-shape quartz reactor (I.D. 8.0 mm) and pretreated at 400 °C in He flow (15 ml min<sup>-1</sup>) for 30 min. After the temperature dropped to 120-150 °C, the reaction gas mixtures including CH<sub>4</sub> (~96.8%) + D<sub>2</sub>O (3.2%) + O<sub>2</sub> (100 ppm) and CH<sub>4</sub> + H<sub>2</sub><sup>18</sup>O + O<sub>2</sub> (100 ppm) were fed to the reactor with the total flow rate of 15 ml min<sup>-1</sup>. In the TPSR mode, the sample was heated from 150 to 700 °C at a rate of 8 °C min<sup>-1</sup>. The reaction outlet composition was analyzed on-line on the MS (Pfeiffer Omnistar GSD320, Shanghai, China) based on the time-dependent evolution of m/z signals of the products.

The m/z values for the chemicals used in this study and their relative intensities.

| Chemicals                      | m/z                          | Chemicals                        | m/z                           |
|--------------------------------|------------------------------|----------------------------------|-------------------------------|
| H <sub>2</sub>                 | 2 (100%), 1 (1%)             | CH <sub>4</sub>                  | 16 (100%), 15 (85%), 14 (16%) |
| D <sub>2</sub>                 | 4 (100%), 2 (1%)             | CH <sub>3</sub> OH               | 31 (100%), 32 (74%), 29 (43%) |
| HD                             | 3 (100%), 2 (1%), 1 (1%)     | CH <sub>3</sub> OD               | 32 (100%), 33 (74%), 29 (43%) |
| H <sub>2</sub> O               | 18 (100%), 17 (21%), 16 (1%) | CH <sub>3</sub> <sup>18</sup> OH | 33 (100%), 34 (74%), 31 (43%) |
| H <sub>2</sub> <sup>18</sup> O | 20 (100%), 19 (21%), 18 (%)  | CO <sub>2</sub>                  | 44 (100%), 28 (50%), 16 (50%) |
| D <sub>2</sub> O               | 20 (100%), 18 (21%), 16 (1%) | C <sup>18</sup> O <sub>2</sub>   | 48 (100%), 30 (50%), 18 (50%) |
| HDO                            | 19 (100%), 18 (21%), 16 (1%) | CH <sub>3</sub> OCH <sub>3</sub> | 45 (100%), 46 (61%), 29 (39%) |
| CH <sub>3</sub> D              | 17 (100%), 16 (76%)          | O <sub>2</sub>                   | 32 (100%), 16 (22%)           |

Indicative m/z values shown in red; relative intensities shown in parentheses.

## S2. Characterization results

### S2.1. Structure and morphology of KFI and CHA zeolites

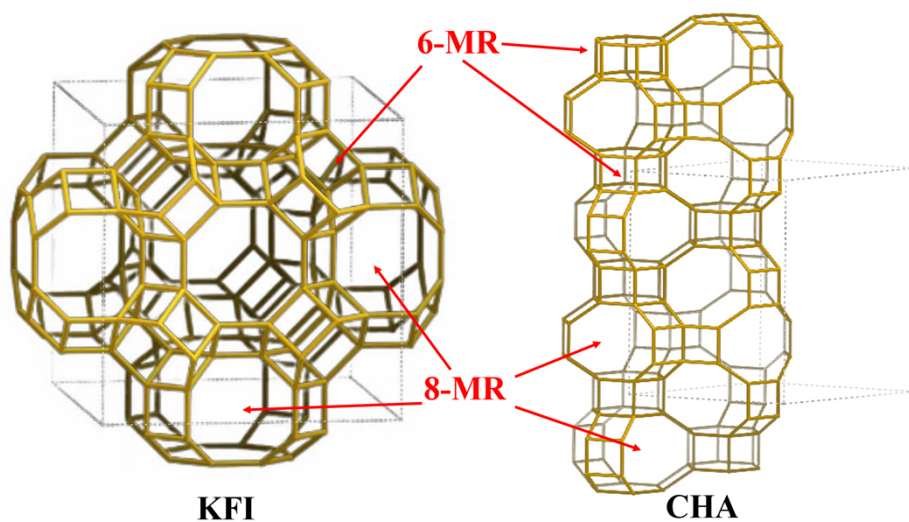

**Fig. S1.** Framework structure of KFI and CHA zeolites. Both the zeolites show a similar ring structure, mainly including double 6MR and 8MR.

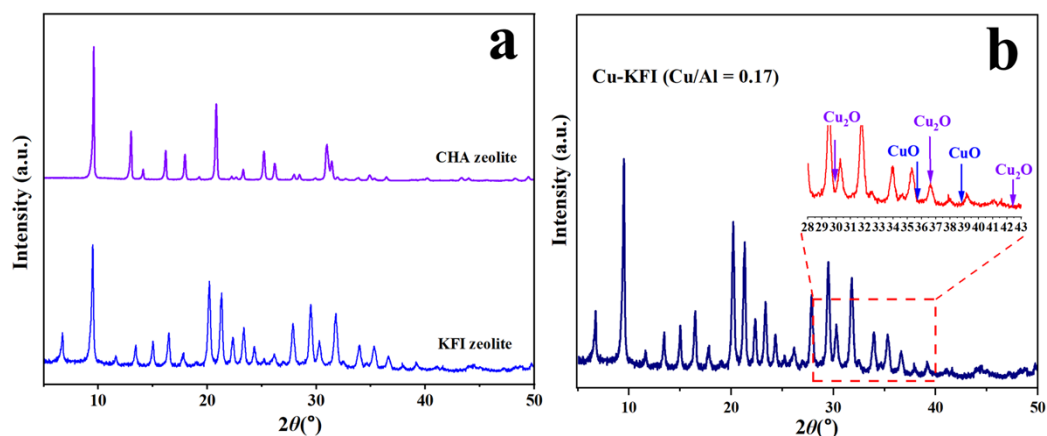

**Fig. S2.** XRD pattern of the as-prepared KFI and CHA zeolites. The result confirms that the zeolites were successfully synthesized.

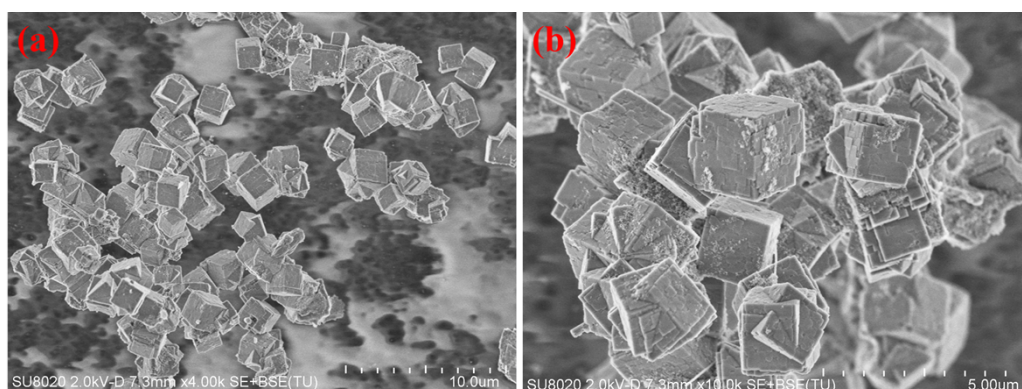

**Fig. S3.** SEM images of the as-prepared KFI zeolite.



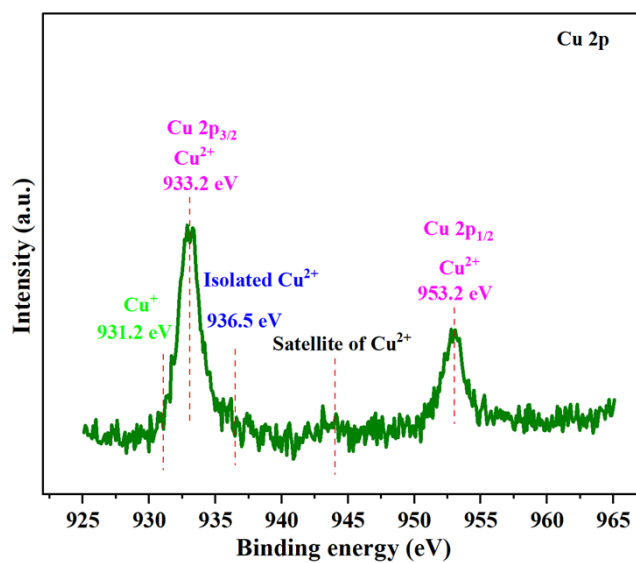

Fig. S4. Cu 2p XP spectrum of Cu-KFI (Cu/Al = 0.17).

## S2.2. HAADF-STEM and H<sub>2</sub>-TPR of Cu-KFI

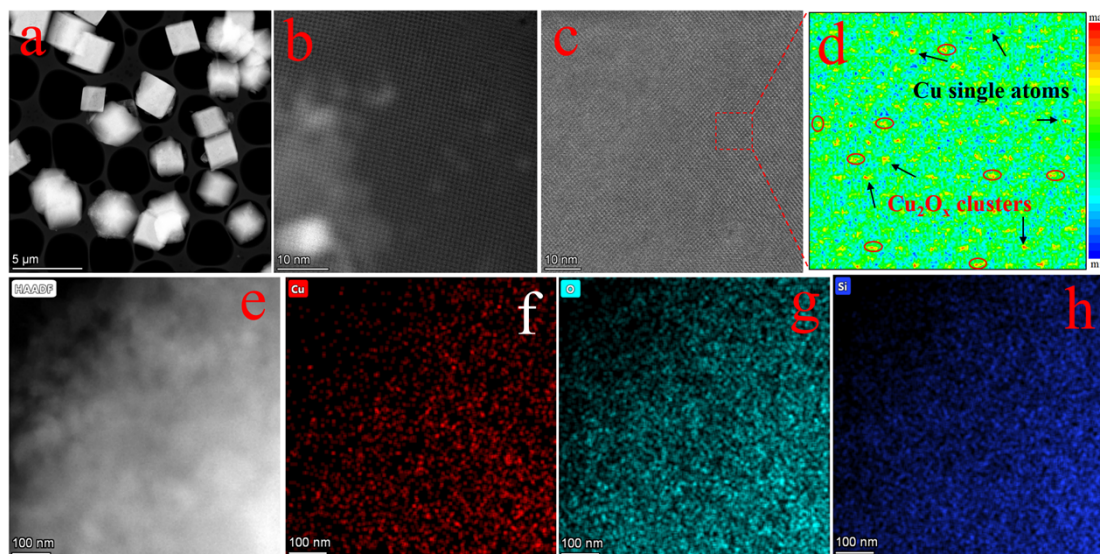

Fig. S5. HAADF-STEM images of the as-prepared Cu-KFI zeolite (a-c), d showing the energy distribution map obtained through image-matrix transformation for the red box in c and the EDX elemental mapping of Cu, O and Si (e-h).

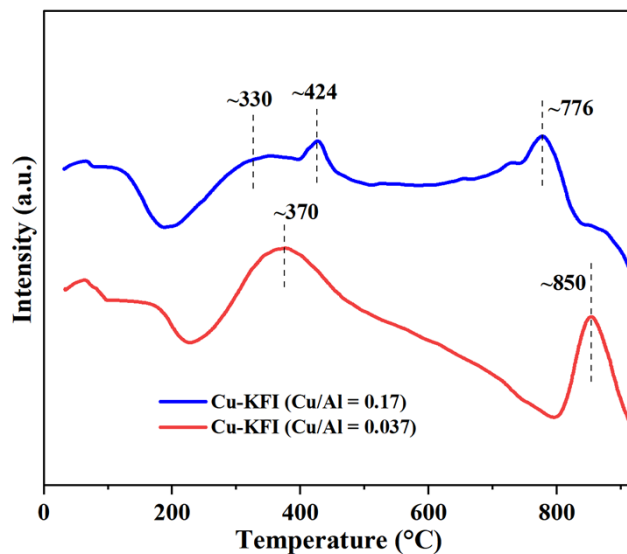

Fig. S6. H<sub>2</sub>-TPR profiles of Cu-KFI zeolites with Cu/Al = 0.037 and 0.17.

### S3. Reaction results

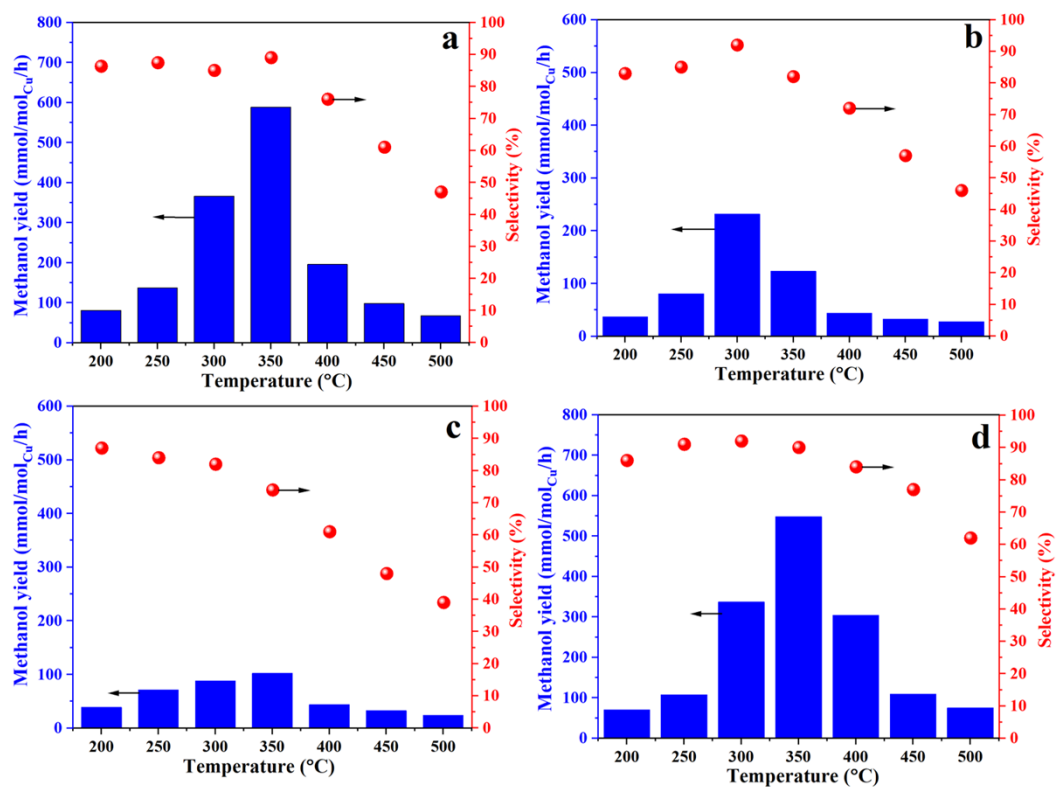

Fig. S7. Selective methane conversion to methanol on **a** Cu-SSZ-13 (Cu/Al = 0.43, Si/Al = 10), **b** Cu-MOR (Cu/Al = 0.47, Si/Al = 11), **c** Cu-ZSM-5 (Cu/Al = 0.51, Si/Al = 15) and **d** Cu-SSZ-39

(Cu/Al = 0.45, Si/Al = 10) under reaction gas mixture of 90% CH<sub>4</sub> + 100 ppm O<sub>2</sub> + 3.2% H<sub>2</sub>O upon elevating reaction temperatures from 200 to 500 °C. Blue bars and red points refer to methanol yield (mmol mol<sub>Cu</sub><sup>-1</sup> h<sup>-1</sup>) and methanol selectivity (%), respectively.

**Table S2.** The comparative activities of continuous MTM reaction on various Cu-zeolites.

| Cu-zeolite | Si/Al | Cu/Al | Reaction conditions                                                                                           | CH <sub>3</sub> OH yield<br>(mmol mol <sub>Cu</sub> <sup>-1</sup> h <sup>-1</sup> ) | Selectivity<br>(%) | Ref. <sup>b</sup> |
|------------|-------|-------|---------------------------------------------------------------------------------------------------------------|-------------------------------------------------------------------------------------|--------------------|-------------------|
| Cu-MOR     | 7.5   | 0.145 | 33 mol% CH <sub>4</sub> , 67 mol% steam, 350 °C                                                               | ~17                                                                                 | /                  | 1                 |
| Cu-MOR     | 15    | 0.185 | 33 mol% CH <sub>4</sub> , 67 mol% steam, 350 °C                                                               | ~22                                                                                 | /                  | 1                 |
| Cu-SSZ-39  | 6.3   | 0.22  | $P_{\text{CH}_4} = 40.5$ kPa, $P_{\text{N}_2\text{O}} = 15.2$ kPa, $P_{\text{H}_2\text{O}} = 4.0$ kPa, 325 °C | ~1020                                                                               | 34                 | 2                 |
| Cu-SSZ-13  | 9.7   | 0.10  | $P_{\text{CH}_4} = 40.5$ kPa, $P_{\text{N}_2\text{O}} = 10.1$ kPa, $P_{\text{H}_2\text{O}} = 2.6$ kPa, 300 °C | 157                                                                                 | 59                 | 2                 |
| Cu-MOR     | 8.9   | 0.15  | $P_{\text{CH}_4} = 40.5$ kPa, $P_{\text{N}_2\text{O}} = 10.1$ kPa, $P_{\text{H}_2\text{O}} = 2.6$ kPa, 300 °C | 220                                                                                 | 54                 | 2                 |
| Cu-CHA     | 17.8  | 0.8   | 0.20 MPa O <sub>2</sub> , 0.5 MPa CO, 2.0 MPa CH <sub>4</sub> , 5 mL H <sub>2</sub> O, 200 °C                 | ~80                                                                                 | /                  | 3                 |
| Cu-SSZ-13  | 10    | 0.33  | $P_{\text{CH}_4} = 49.5$ kPa, $P_{\text{O}_2} = 0.025$ kPa, $P_{\text{H}_2\text{O}} = 2.3$ kPa, 225 °C        | 13                                                                                  | /                  | 4                 |
| Cu-SSZ-13  | 23    | 0.22  | $P_{\text{CH}_4} = \sim 72$ kPa, $P_{\text{O}_2} = 0.09$ kPa, $P_{\text{H}_2\text{O}} = 3.14$ kPa, 270 °C     | 130                                                                                 | /                  | 5                 |
| Cu-SSZ-13  | 11    | 0.23  | 98% CH <sub>4</sub> , 400 ppm O <sub>2</sub> , 2% H <sub>2</sub> O, 300 °C                                    | 540                                                                                 | 91                 | 6                 |

|               |            |              |                                                                                                                                                                                 |               |            |                      |
|---------------|------------|--------------|---------------------------------------------------------------------------------------------------------------------------------------------------------------------------------|---------------|------------|----------------------|
| Cu-MOR        | 10.9       | 0.27         | 98% CH <sub>4</sub> , 400 ppm O <sub>2</sub> ,<br>2% H <sub>2</sub> O, 300 °C                                                                                                   | ~15           | ~18        | 6                    |
| Cu-<br>ZSM-5  | 12.8       | 0.27         | 98% CH <sub>4</sub> , 400 ppm O <sub>2</sub> ,<br>2% H <sub>2</sub> O, 300 °C                                                                                                   | ~100          | ~18        | 6                    |
| Cu-MOR        | 10         | /            | 48 ml min <sup>-1</sup> CH <sub>4</sub> , 2 ml<br>min <sup>-1</sup> O <sub>2</sub> , 50 ml min <sup>-1</sup> N <sub>2</sub> ,<br>0.5 g h <sup>-1</sup> H <sub>2</sub> O, 300 °C | 310           | < 50%      | 7                    |
| Cu-CHA        | 5          | ~0.13        | CH <sub>4</sub> /O <sub>2</sub> /H <sub>2</sub> O (g)/N <sub>2</sub> =<br>48/2/10/50 ml min <sup>-1</sup> , 300<br>°C                                                           | ~700          | ~79        | 8                    |
| Cu-CHA        | 10         | ~0.08        | CH <sub>4</sub> /O <sub>2</sub> /H <sub>2</sub> O (g)/N <sub>2</sub> =<br>48/2/10/50 ml min <sup>-1</sup> , 300<br>°C                                                           | ~900          | ~88        | 8                    |
| Cu-KFI        | 3.5        | ~0.03<br>7   | 90% CH <sub>4</sub> , 100 ppm O <sub>2</sub> ,<br>3.2% H <sub>2</sub> O, 400 °C                                                                                                 | ~250          | ~45        | This<br>work         |
| Cu-SSZ-<br>13 | 4.1        | 0.18         | 90% CH <sub>4</sub> , 100 ppm O <sub>2</sub> ,<br>3.2% H <sub>2</sub> O, 400 °C                                                                                                 | ~327          | ~81        | This<br>work         |
| Cu-MOR        | 11         | 0.47         | 90% CH <sub>4</sub> , 100 ppm O <sub>2</sub> ,<br>3.2% H <sub>2</sub> O, 300 °C                                                                                                 | 231.6         | 92         | This<br>work         |
| Cu-SSZ-<br>13 | 10         | 0.43         | 90% CH <sub>4</sub> , 100 ppm O <sub>2</sub> ,<br>3.2% H <sub>2</sub> O, 350 °C                                                                                                 | 588.7         | 89         | This<br>work         |
| Cu-<br>ZSM-5  | 15         | 0.51         | 90% CH <sub>4</sub> , 100 ppm O <sub>2</sub> ,<br>3.2% H <sub>2</sub> O, 350 °C                                                                                                 | 102.4         | 74         | This<br>work         |
| Cu-SSZ-<br>39 | 10         | 0.47         | 90% CH <sub>4</sub> , 100 ppm O <sub>2</sub> ,<br>3.2% H <sub>2</sub> O, 400 °C                                                                                                 | 548.3         | 90         | This<br>work         |
| <b>Cu-KFI</b> | <b>3.5</b> | <b>~0.17</b> | <b>90% CH<sub>4</sub>, 100 ppm O<sub>2</sub>,<br/>3.2% H<sub>2</sub>O, 450 °C</b>                                                                                               | <b>~880.3</b> | <b>~83</b> | <b>This<br/>work</b> |

**Table S3.** Turnover number (TON) and methanol selectivity of Cu-KFI zeolite (Cu/Al = 0.17) at reaction temperature of 450 °C with different reaction time.

| Reaction time<br>(min) | Methanol yield<br>( $\mu\text{mol}/\text{g}_{\text{cat.}}$ ) | TON  | Selectivity<br>(%) |
|------------------------|--------------------------------------------------------------|------|--------------------|
| 30                     | 137.5                                                        | 0.43 | 84                 |
| 60                     | 288.9                                                        | 0.91 | 82                 |
| 120                    | 566.2                                                        | 1.77 | 85                 |
| 240                    | 1083.5                                                       | 3.40 | 85                 |
| 360                    | 1641.9                                                       | 5.15 | 82                 |
| 600                    | 2761.9                                                       | 8.66 | 81                 |

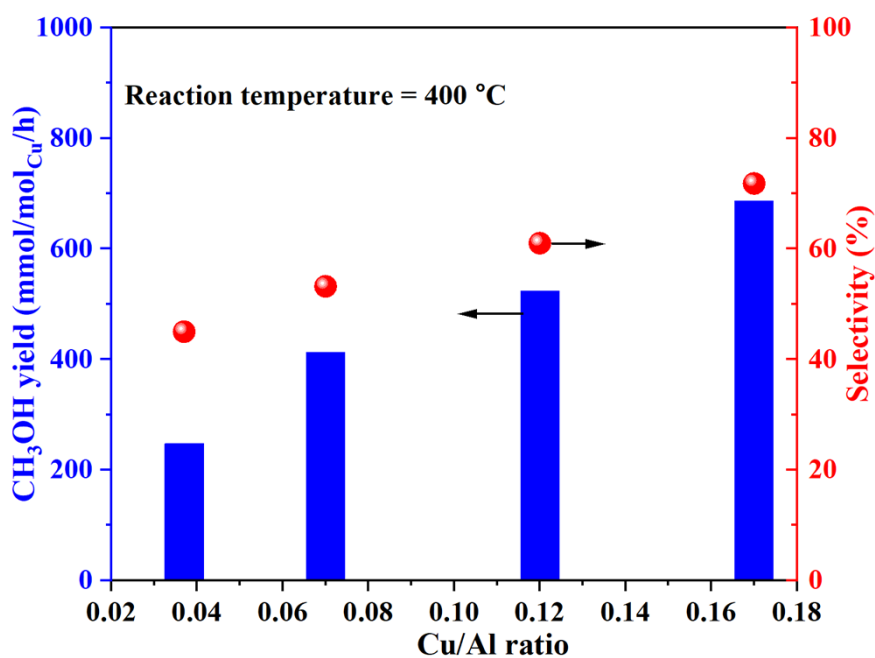

**Fig. S8.** Selective methane conversion to methanol on Cu-KFI zeolites with different Cu/Al ratios under reaction gas mixture of 90% CH<sub>4</sub> + 100 ppm O<sub>2</sub> + 3.2% H<sub>2</sub>O at the reaction temperature of 400 °C. Blue bars and red points refer to methanol yield (mmol mol<sub>Cu</sub><sup>-1</sup> h<sup>-1</sup>) and methanol selectivity (%), respectively.

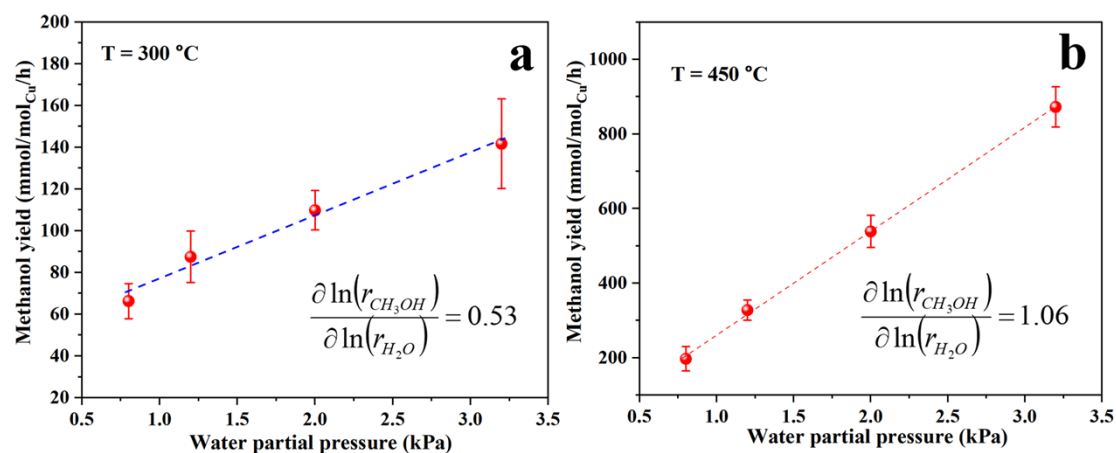

**Fig. S9.** Kinetic results of methane continuous conversion to methanol over Cu-KFI (Cu/Al = 0.17), which show the different reaction orders on water at different reaction temperatures.

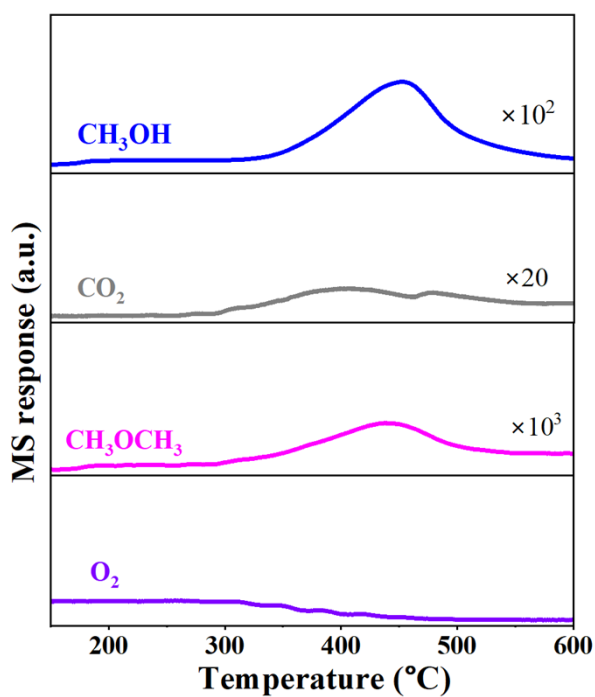

**Fig. S10.** Temperature-programmed surface reactions (TPSR) of continuous MTM on Cu-KFI (Cu/Al = 0.17). Reaction conditions: 100 mg catalyst was heated from 150 to 600 °C, heating rate = 8 °C min<sup>-1</sup>, total flow rate = 15 ml min<sup>-1</sup>; 96.8% CH<sub>4</sub>, 3.2% H<sub>2</sub>O, 100 ppm O<sub>2</sub>.

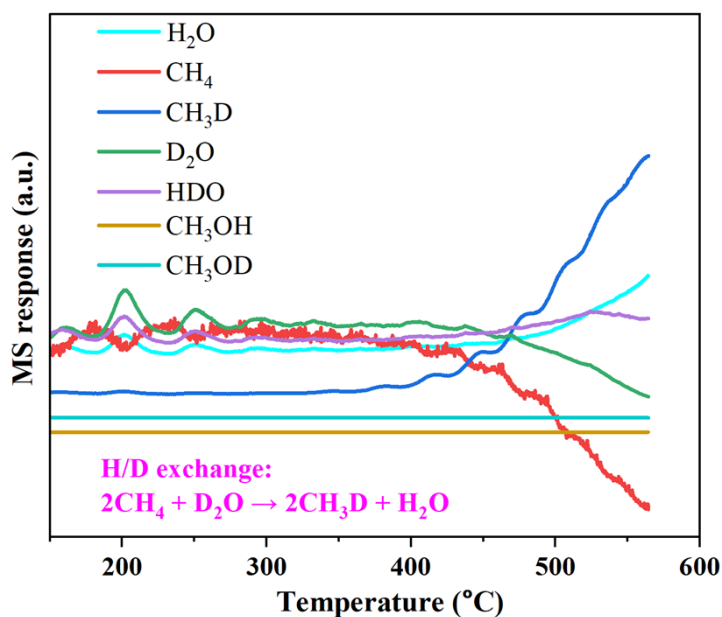

**Fig. S11.** Temperature-programmed surface reactions (TPSR) of the KFI zeolite without Cu species. Reaction conditions: 100 mg KFI was heated from 150 to 600 °C, heating rate = 8 °C min<sup>-1</sup>, total flow rate = 15 ml min<sup>-1</sup>; 10% CH<sub>4</sub>, 3.2% D<sub>2</sub>O, He as the balance gas. The result shows that the H/D exchange between CH<sub>4</sub> and D<sub>2</sub>O occurred and CH<sub>3</sub>OH and CH<sub>3</sub>OD were not detected.

## S4. References

1. Y. R. Jeong, H. Jung, J. Kang, J. W. Han and E. D. Park, *ACS Catal.*, 2021, **11**, 1065-1070.
2. O. Memioglu and B. Ipek, *Chem. Commun.*, 2021, **57**, 1364-1367.
3. S. Sogukkanli, T. Moteki and M. Ogura, *Green Chem.*, 2021, **23**, 2148-2154.
4. A. Koishybay and D.F. Shantz, *J. Am. Chem. Soc.*, 2020, **142**, 11962-11966.
5. K. T. Dinh, M. M. Sullivan, K. Narsimhan, P. Serna, R. J. Meyer, M. Dinca and Y. Román-Leshkov, *J. Am. Chem. Soc.*, 2019, **141**, 11641-11650.
6. L. L. Sun, Y. Wang, C. M. Wang, Z. K. Xie, N. J. Guan and L. D. Li, *Chem*, 2021, **7**, 1557-1568.
7. J. Ohyama, A. Hirayama, Y. Tsuchimura, N. Kondou, H. Yoshida, M. Machida, S. Nishimura, K. Kato, I. Miyazato and K. Takahashi, *Catal. Sci. Technol.*, 2021, **11**, 3437-3446.
8. Y. Tsuchimura, H. Yoshida, M. Machida, S. Nishimura, K. Takahashi and J. Ohyama, *Energy Fuels*, 2023, **37**, 9411-9418.
